# Supplementary material for: Combined simultaneous multislice bSSFP and compressed sensing for first-pass myocardial perfusion at 1.5 T with high spatial resolution and coverage
Source: PubMed Central journal article supplement (PMC7611375; doi:10.1002/mrm.28345), 2020-06-12
Supplement: EMS128774-supplement-Supplementary_Material.pdf [file EMS128774-supplement-Supplementary_Material.pdf]

## SUPPORTING INFORMATION

Additional Supporting Information may be found online in the Supporting Information section.

**FIGURE S1** Subtraction images produced by subtracting each image series acquired with an in-plane acceleration factor of 3.5 and above from the corresponding series acquired with an in-plane acceleration factor of 2.5. Resultant subtracted signal intensities are normalized to 25% of the maximum signal of the reference image ( $S_{\max}$ ). Normalized RMS errors are presented as a percentage of the signal range of the reference image (in-plane acceleration = 2.5)

**FIGURE S2** Example pseudorandom k-space trajectories for the proposed undersampling scheme. A, k-Space trajectory of the dynamic with the largest maximum absolute jump in phase-encoding direction ( $K_y$ ). B, Absolute jumps in  $K_y$ , plotted as a function of TR for the k-space trajectory plotted in (A). C, k-Space trajectory of the dynamic with the smallest maximum absolute jump in phase-encoding direction ( $K_y$ ). D, Absolute jumps in  $K_y$ , plotted as a function of TR for k-space trajectory plotted in (C)
